# Supplementary material for: Water-Based Bi2S3 Nano-Inks Obtained with Surfactant-Assisted Liquid Phase Exfoliation and Their Direct Processing into Thin Films
Source: MDPI journal article supplement (doi:10.3390/colloids8030028), 2024-04-30

Supporting information

# Water-Based Bi<sub>2</sub>S<sub>3</sub> Nano-Inks Obtained with Surfactant-Assisted Liquid Phase Exfoliation and Their Direct Processing into Thin Films

Micaela Pozzati <sup>1</sup>, Felix Boll <sup>2</sup>, Matteo Crisci <sup>2</sup>, Sara Domenici<sup>1</sup>, Francesco, Scotognella,<sup>1</sup> Bernd Smarsly<sup>2</sup>, Teresa Gatti <sup>1,2\*</sup> and Mengjiao Wang <sup>1\*</sup>

<sup>1</sup> Dipartimento Scienza Applicata e Tecnologia (DISAT), Politecnico di Torino, Corso Duca degli Abruzzi 24, 10129 Torino, Italy; micaela.pozzati@polito.it (M.P.)

<sup>2</sup> Center for Materials Research (LaMa), Justus Liebig University, Heinrich-Buff-Ring 17, 35392 Giessen, Germany

\*Correspondence: teresa.gatti@polito.it (T.G.); mengjiao.wang@polito.it (M.W.)

**Table S1:** Parameters of LPE process

|    |                                |                                    |            |                          |                  |
|----|--------------------------------|------------------------------------|------------|--------------------------|------------------|
| 14 |                                |                                    |            |                          |                  |
| 15 | MC                             | Initial bulk concentration (mg/mL) | Surfactant | Surf. concentration (mM) | Exfoliation time |
| 16 |                                |                                    |            |                          |                  |
| 17 | Bi <sub>2</sub> S <sub>3</sub> | 10                                 | SDS        | 8.2                      | 3 h              |
| 18 |                                |                                    |            | 4.1                      |                  |
| 19 |                                |                                    |            | 2.0                      |                  |
| 20 |                                |                                    |            | 1.0                      |                  |
| 21 |                                |                                    |            | 0.5                      |                  |
| 22 | Bi <sub>2</sub> S <sub>3</sub> | 10                                 | SDBS       | 8.2                      | 3 h              |
| 23 |                                |                                    |            | 4.1                      |                  |
| 24 |                                |                                    |            | 2.0                      |                  |
| 25 |                                |                                    |            | 1.0                      |                  |
| 26 |                                |                                    |            | 0.5                      |                  |
| 27 |                                |                                    |            |                          |                  |
| 28 | Bi <sub>2</sub> S <sub>3</sub> | 10                                 | SHS        | 8.2                      | 3 h              |
| 29 |                                |                                    |            | 4.1                      |                  |
| 30 |                                |                                    |            | 2.0                      |                  |
| 31 |                                |                                    |            | 1.0                      |                  |
| 32 |                                |                                    |            | 0.5                      |                  |

**Figure S1:** Histogram of the distribution of particle size  $\text{Bi}_2\text{S}_3$ 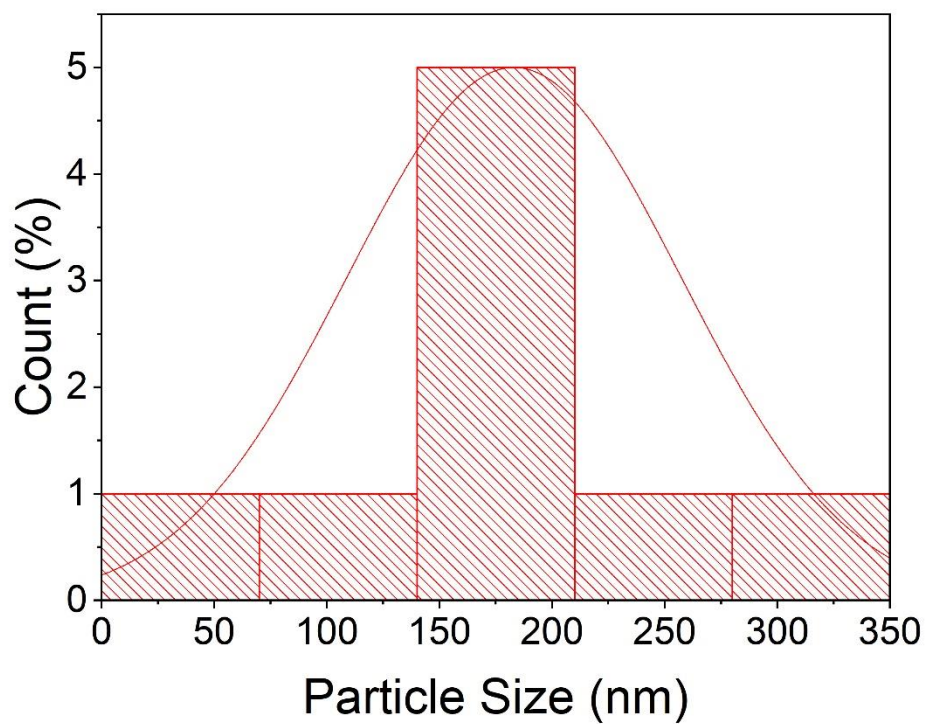

47

**Figure S2:** U-Vis spectrum of SDS 8.2mM.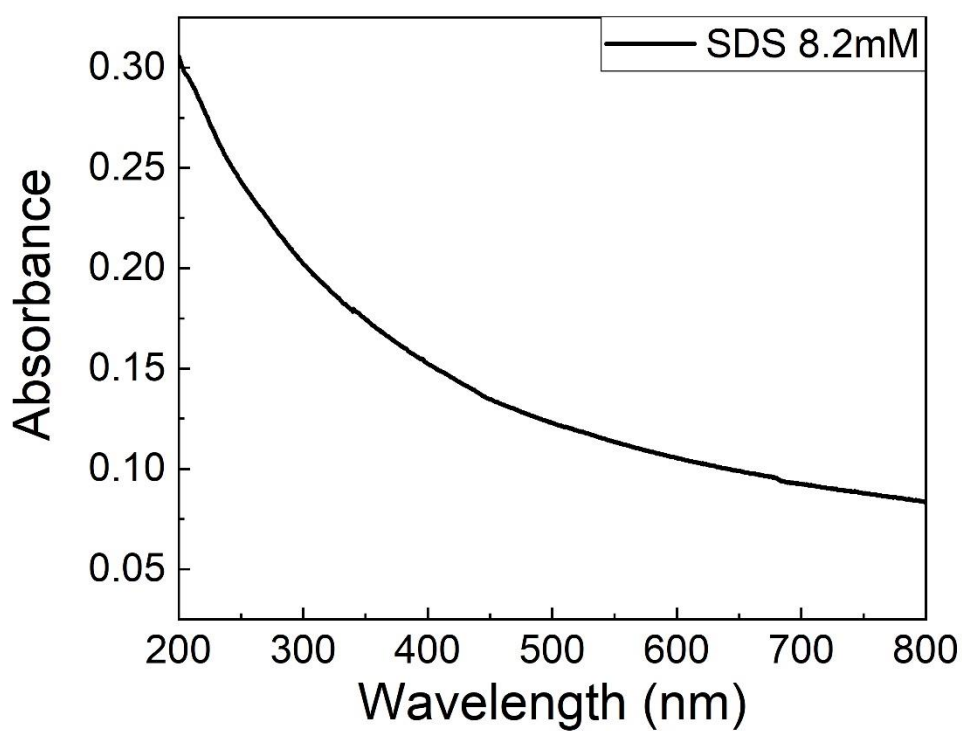

**Figure S3:** DLS of Bi<sub>2</sub>S<sub>3</sub> SHS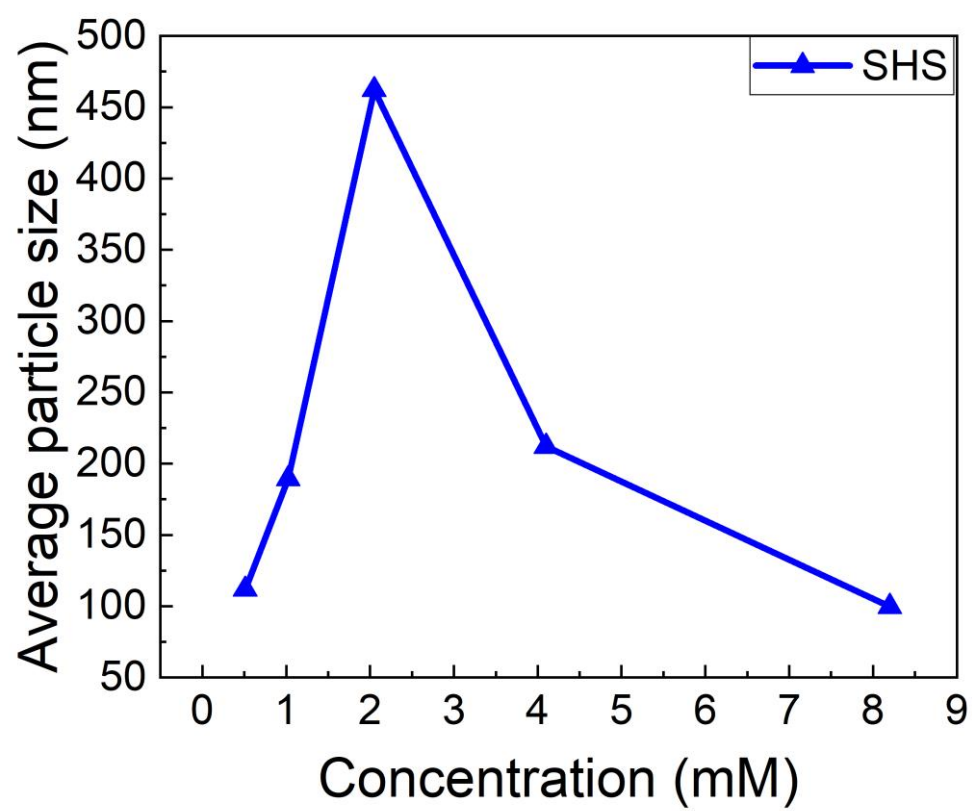

**Figure S4:** SEM images of the  $\text{Bi}_2\text{S}_3$  thin films with (a) 30 (b) 50 layers.

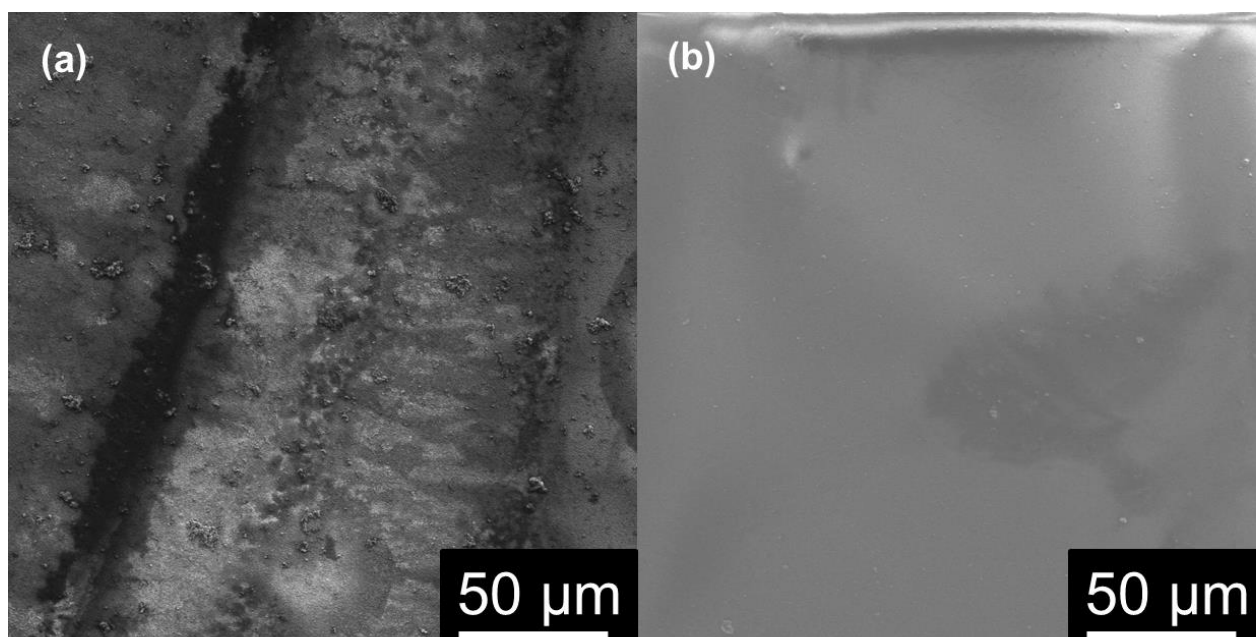

Supplement: s1 [file s1]
